# Supplementary material for: MoS2@N-doped graphitic carbon/TiO2 photocatalysts for photocatalytic H2 production from lignocellulosic biomass
Source: Royal Society of Chemistry journal article supplement (doi:10.1039/d3cc01812a), 2023-01-01
Supplement: d3cc01812a1.pdf [file d3cc01812a1.pdf]

## Supporting Information

### **MoS<sub>2</sub>@N-doped graphitic carbon/TiO<sub>2</sub> photocatalysts for photocatalytic H<sub>2</sub> production from lignocellulosic biomass**

Chi Ma,<sup>a</sup> Quan Cheng,<sup>a</sup> Ze-Xin Huang,<sup>a</sup> Fu-Guang Zhang,<sup>a</sup> Qing-Yu Liu,<sup>a</sup> Yong-Jun Yuan<sup>\*a</sup>

- a. College of Materials and Environmental Engineering, Hangzhou Dianzi University, Hangzhou, 310018, People's Republic of China. \*E-mail: yjyuan@hdu.edu.cn.

## ***Experimental Section***

### ***Reagent.***

All chemicals and reagents were analytical grade and used as received without further purification.

### ***Synthesis of ZIF-8.***

2 mmol  $\text{Zn}(\text{NO}_3)_2 \cdot 6\text{H}_2\text{O}$  and 15 mmol 1-methylimidazole were dissolved in 100 mL of methanol solution, which was then added into 100 mL of methanol solution consisting of 10 mmol 2-methylimidazole. After a rapid-mixing duration of 3 seconds, the mixture solution was aged at room temperature for 24 hours without stirring. The resulting white precipitate was separated from solution by centrifugation at 4000 rpm for 2 min and then washed by absolute ethanol, and finally dried at a vacuum drying oven at room temperature.

### ***Synthesis of N-doped graphene carbon (NGC)***

1 g ZIF-8 powder put in alumina crucible was transferred to the atmosphere furnace, which was treated by a low-temperature annealing at 120 °C for 1 h and then a high-temperature annealing at 800 °C for 2 h under a Ar flow, and the heating rate was 5 °C min<sup>-1</sup>. During the annealing process, the organic ligand of ZIF-8 was carbonized and converted N-doped graphitic carbon (NGC), while the zinc ions were reduced to Zn metal. The Zn metal will vaporize when the temperature is close to the boiling point of Zn metal, and residual was removed by pickling.

### ***Synthesis of MoS<sub>2</sub>-NGC***

The ***MoS<sub>2</sub>-NGC*** was prepared via hydrothermal method in aqueous solution

consisting of NGC,  $\text{Na}_2\text{MoO}_4 \cdot 4\text{H}_2\text{O}$  and thiourea. In a typical synthesis, 100 mg NGC, 245 mg  $\text{Na}_2\text{MoO}_4 \cdot 4\text{H}_2\text{O}$  and 489 mg thiourea were dispersed in 30 ml deionized water. After 10 minutes of ultrasound, the mixed solution was transferred into a 50 ml Teflon-line autoclave and then heated at 200 °C for 24 h. After the Teflon-line autoclave was cooled to room temperature, the black precipitate was separated from the solution via centrifugation at 5000 rpm for 5 minutes, followed by washing with absolute ethanol and dried at a vacuum drying oven at room temperature.

### ***Synthesis of $\text{MoS}_2$ -NGC/ $\text{TiO}_2$ photocatalysts***

The  $\text{MoS}_2$ -NGC/ $\text{TiO}_2$  photocatalysts were prepared via hydrothermal method in aqueous solution consisting of  $\text{MoS}_2$ -NGC, tetrabutyl titanate ( $\text{Ti}(\text{OBU})_4$ ) in aqueous solution. In a typical synthesis, 1 ml  $\text{Ti}(\text{OBU})_4$  dissolved in 10 ml of absolute ethyl alcohol was added dropwise into 50 ml aqueous solution containing a certain amount of NGC. After 5 minutes of ultrasound, the mixed solution was transferred into two Teflon-line autoclave with a volume of 50 ml and then heated at 200 °C for 24 h. After the Teflon-line autoclave was cooled to room temperature, the grey precipitate was separated from the solution via centrifugation at 5000 rpm for 5 minutes, followed by washing with absolute ethanol and dried at a vacuum drying oven at room temperature.

### ***Characterization***

The morphology and microstructure of materials was performed on a field emission Hitachi S-4800 scanning electron microscope (SEM, Hitachi, Japan) and JEOL JEM 2010 transmission electron microscope (TEM, JEOL, Japan). The crystalline phase

of materials was measured by a Rigaku-miniflex 6 X-ray diffractometer (Japan) equipped with Cu  $K\alpha$  ( $\lambda = 0.15406$  nm) radiation with a scan rate of  $10^\circ\cdot\text{min}^{-1}$ . XPS analysis was performed on a Thermo ESCALAB 250XI XPS system with Al  $K\alpha$  X-ray source, and all peaks were corrected by using the C 1s level at 284.8 eV as a standard. The UV-vis absorbance spectra of photocatalysts was measured on a TU1901 spectrophotometer (Beijing Puyan TU1901) equipped with an integrating sphere by using  $\text{BaSO}_4$  as the background. The BET surface area of  $\text{TiO}_2$  was obtained from nitrogen adsorption-desorption isotherms measured at 77 K using a Micromeritics ASAP 2460 apparatus, the BET surface area was calculated from the adsorption data, and the pore distribution was calculated by the Barret-Joyner-Halenda method. The electrochemical measurements were performed on a CHI660E electrochemical workstation (Shanghai Chenhua Limited, China) at room temperature. Transient photocurrent and LSV measurements were performed on a standard three-electrode system composed of a Pt wire counter electrode, saturated Ag/AgCl reference electrode, and sample-coated ITO (Transient photocurrent measurements) or sample-coated glassy carbon (LSV measurements) working electrode in the presence of 0.5 M  $\text{Na}_2\text{SO}_4$  aqueous solution as the electrolyte. The sample-coated ITO working electrode was prepared by depositing of suspension solution of photocatalyst ( $1 \text{ mg}\cdot\text{ml}^{-1}$ ) on ITO glass through spin coating method, and the sample-coated glassy carbon (LSV measurements) working electrode was prepared by coating the  $0.2 \text{ mg}\cdot\text{ml}^{-1}$  photocatalyst suspension dispersed in 2% Nafion ethanol on the glassy carbon electrode. The applied electric

field voltage for transient photocurrent measurement was +0.5 V vs. RHE. For the CO<sub>2</sub> detection, 1 mL gas extracted from the reaction system was detected by carbon dioxide analyzer (AR8200, Smart Seneor, China). The organics were analyzed by Agilent HPLC 1260 high performance liquid chromatographic instrument. The total organic carbon (TOC) of reaction solution was measured on An Elementar Vario TOC Analyzer.

### ***Photocatalytic H<sub>2</sub> production experiments***

The photocatalytic H<sub>2</sub> production experiments were carried out in a closed gas circulation and evacuation H<sub>2</sub> generation system in the presence of a 300 W Xe lamp as the light resource. To prepare photocatalytic reaction solution, 50 mg photocatalyst was added to 250 ml aqueous solution containing 1 g substance in quartz reactor with a volume of 450 ml with sonication for 10 min, and then the reactor was connected to the photocatalytic reaction system. These biomass were first screened through an 80-mesh (180 μm) sieve, and the lignocellulosic biomass used for photocatalytic H<sub>2</sub> production was particle powder with size of less than 180 μm. Before irradiation, the reaction solution was degassed to remove the dissolved air. The temperature was maintained around room temperature by a cooling cycle water. A GC1690 online gas chromatograph with a TCD detector was used to analyze the amount of evolved H<sub>2</sub>. The apparent quantum efficiency (AQY) of photocatalytic H<sub>2</sub> production performed at monochromatic light was conducted by the similar process described above expect using monochromatic light filter, and the AQY was calculated according to the following equations:

$$n_{\text{photons}} = \frac{P\lambda}{hc} \times t \quad (1)$$

$$\begin{aligned} \text{AQY}[\%] &= \frac{\text{number of reacted electrons}}{\text{number of incident photons}} \times 100 \\ &= \frac{2 \times \text{number of evolved H}_2 \text{ molecules}}{\text{number of incident photons}} \times 100 \quad (2) \end{aligned}$$

where  $P$ ,  $\lambda$ ,  $h$ ,  $c$  and  $t$  is the input optical power, wavelength of the light, Planck's constant, speed of light and the illumination time, respectively.

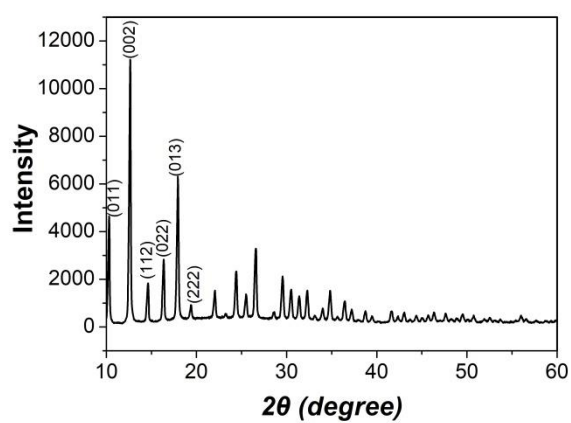

**Figure S1.** XRD pattern of ZIF-8.

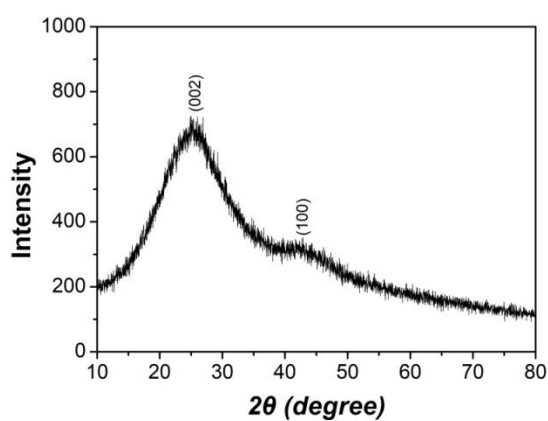

**Figure S2.** XRD pattern of NGC obtained via pyrolysis and acid leaching treatment of ZIF-8.

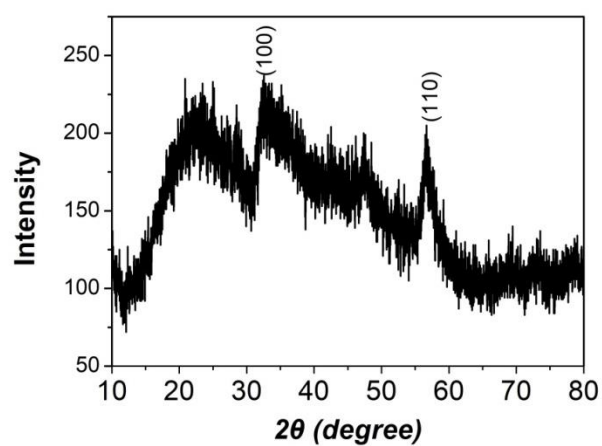

**Figure S3.** XRD pattern of MoS<sub>2</sub>/NGC composite.

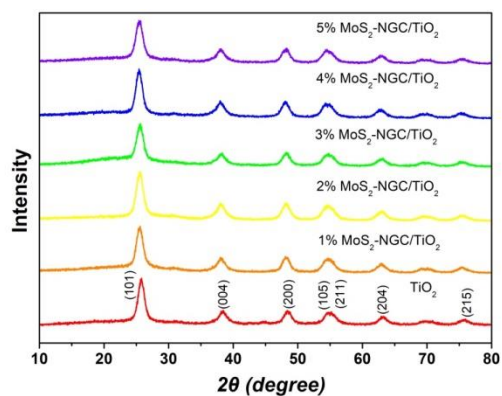

**Figure S4.** XRD patterns of various MoS<sub>2</sub>-NGC/TiO<sub>2</sub> photocatalysts.

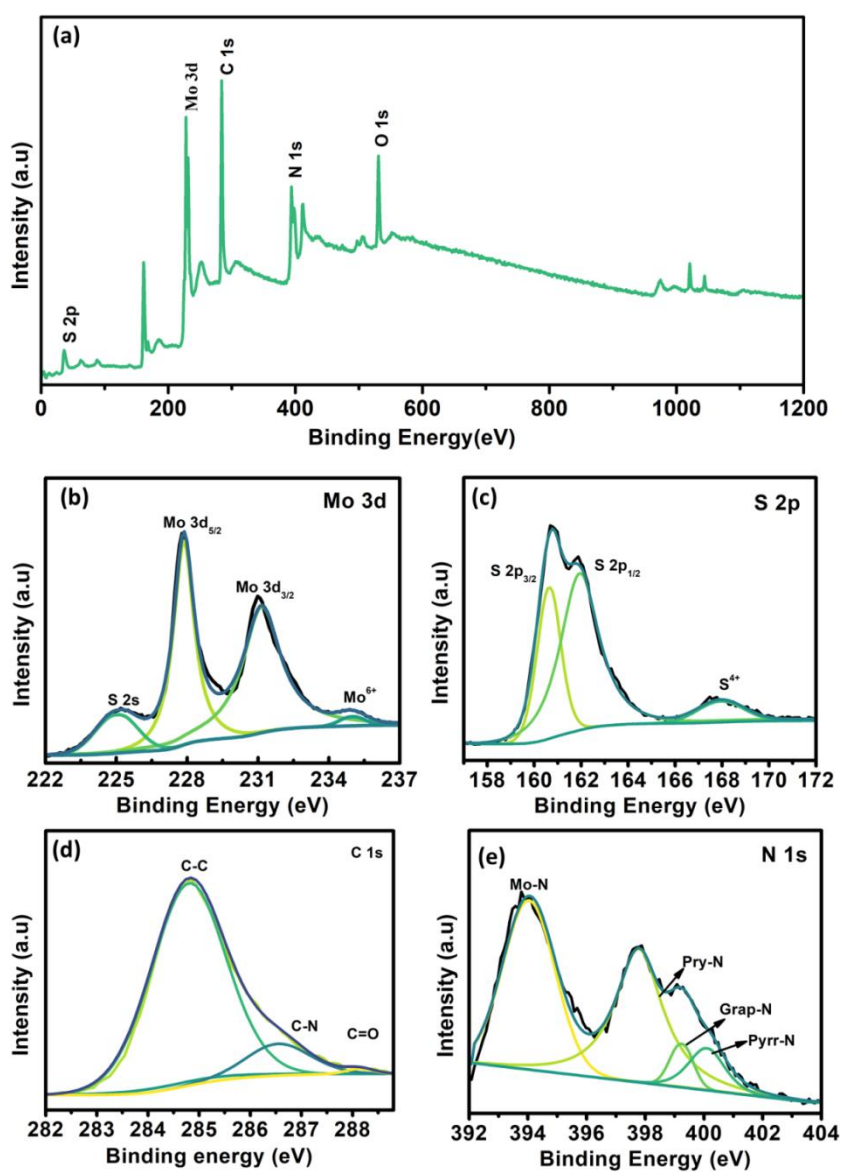

**Figure S5.** (a) The survey XPS spectrum for MoS<sub>2</sub>-NGC cocatalyst. (b-e) High-resolution Mo 3d, S 2p, C 1s and N 1s of MoS<sub>2</sub>-NGC cocatalyst.



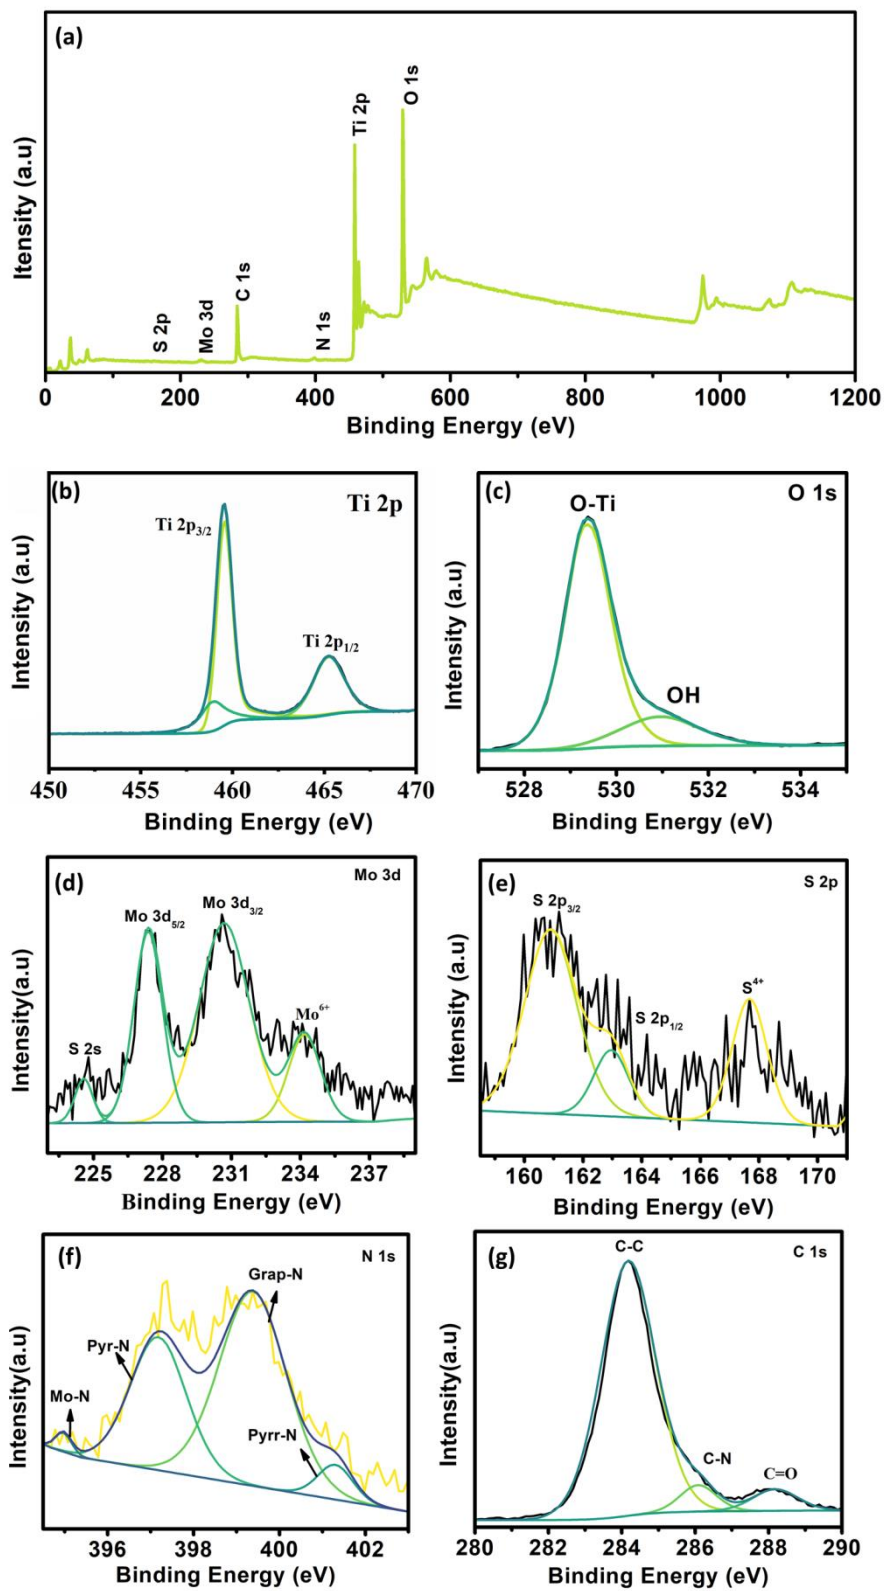

**Figure S6.** (a) The survey XPS spectrum for 3% MoS<sub>2</sub>-NGC/TiO<sub>2</sub> photocatalyst. (b-g) High-resolution Ti 2p, O 1s, Mo 3d, S 2p, N 1s and C 1s of MoS<sub>2</sub>-NGC cocatalyst.

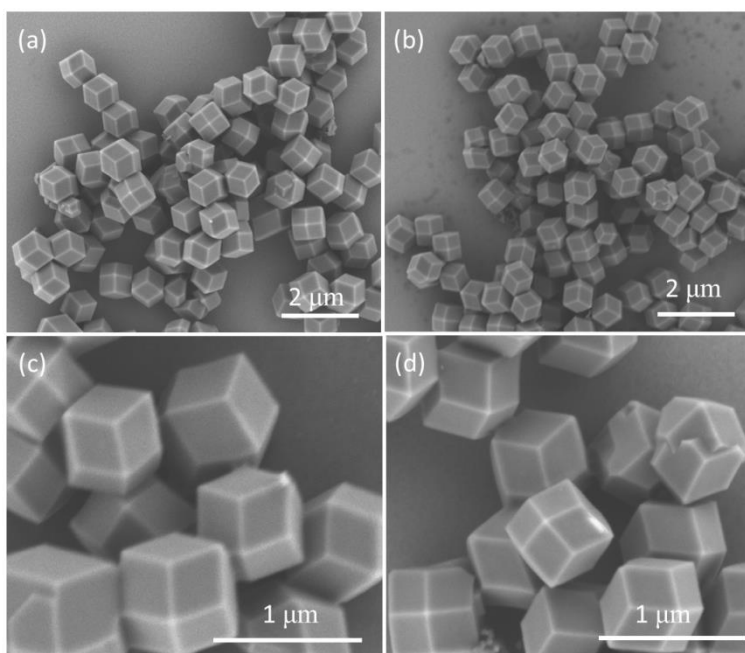

**Figure S7.** SEM images of ZIF-8.

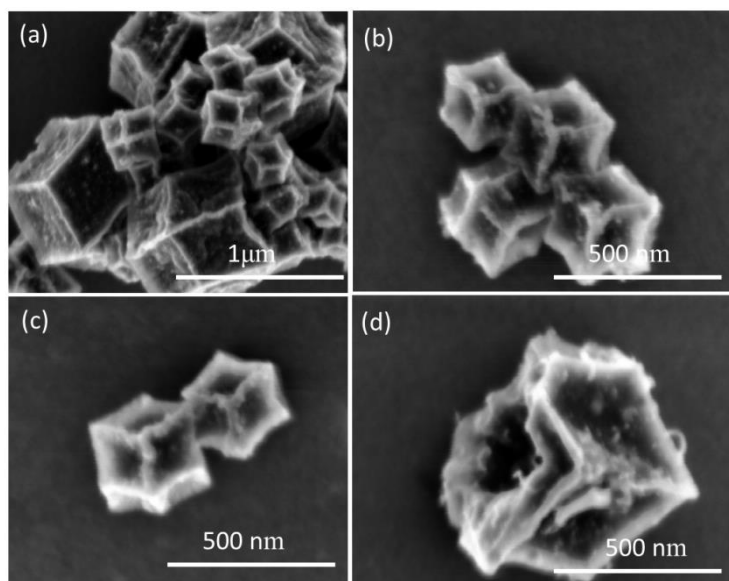

**Figure S8.** SEM images of NGC.

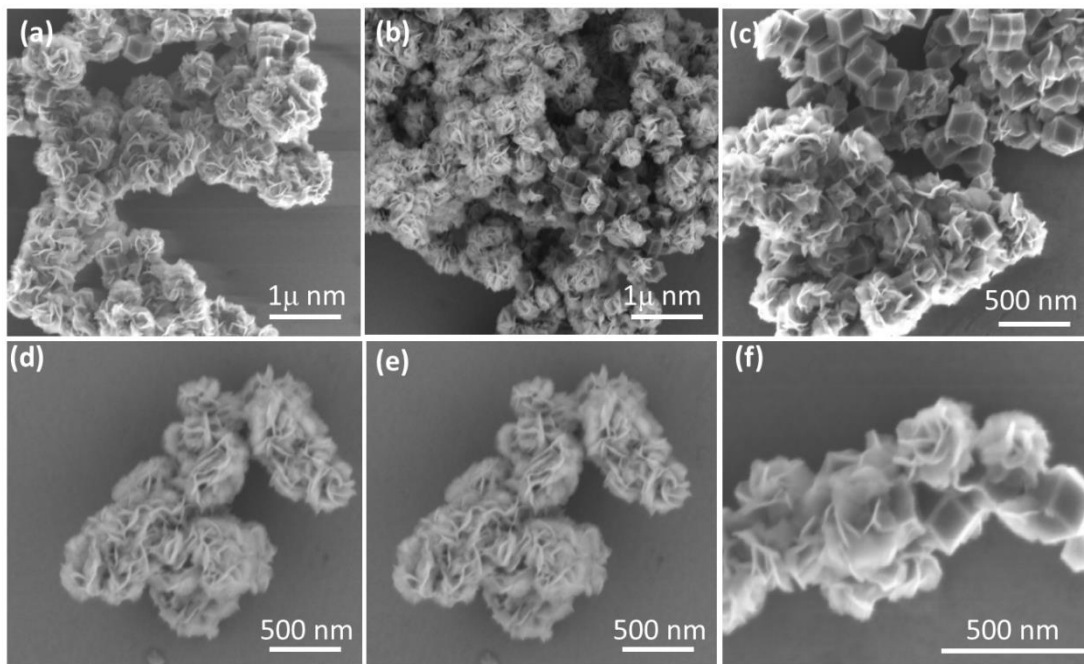

**Figure S9.** SEM images of MoS<sub>2</sub>-NGC cocatalyst.

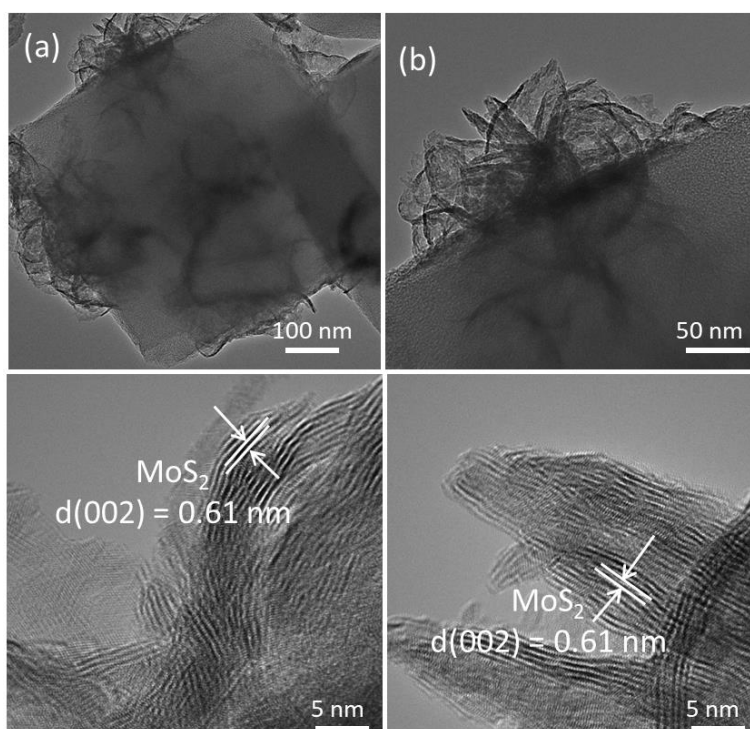

**Figure S10.** TEM and HRTEM images of MoS<sub>2</sub>-NGC cocatalyst.

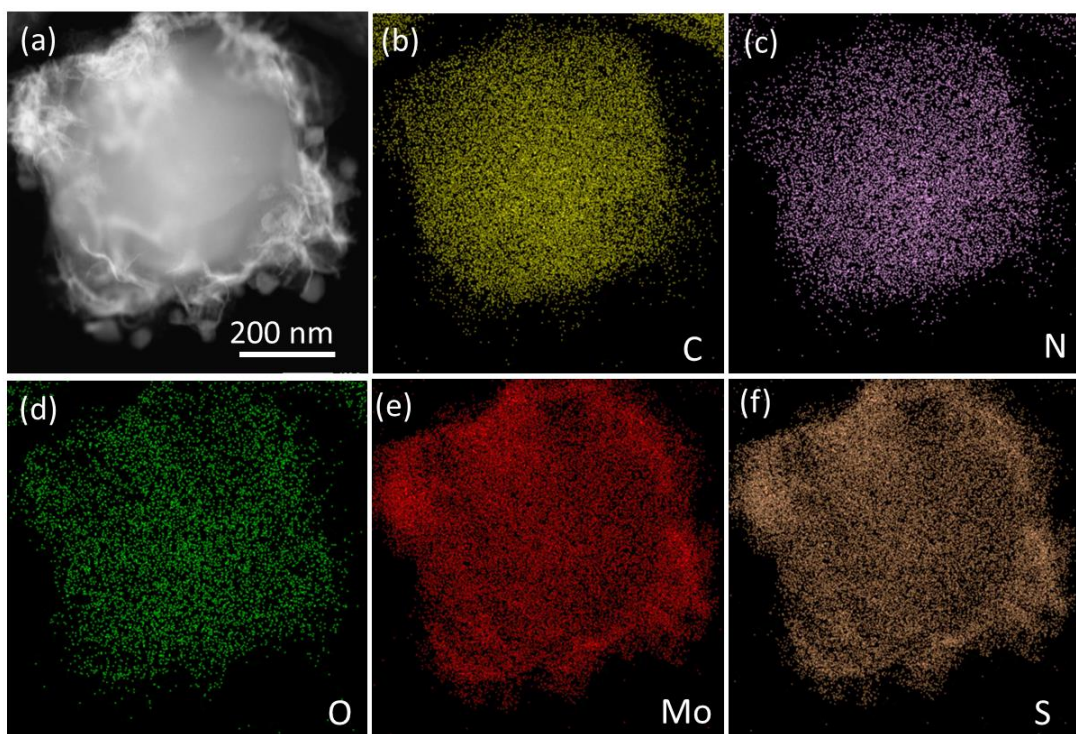

**Figure S11.** HAADF-STEM and elemental mapping images of MoS<sub>2</sub>-NGC cocatalyst.

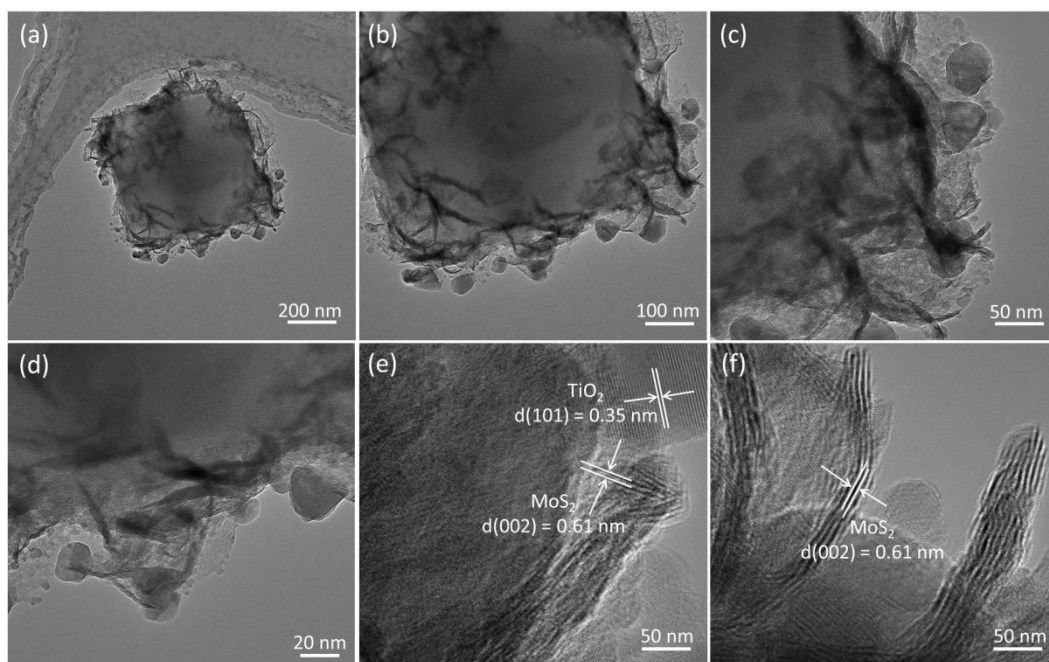

**Figure S12.** TEM and HRTEM images of 5% MoS<sub>2</sub>-NGC/TiO<sub>2</sub> photocatalyst.

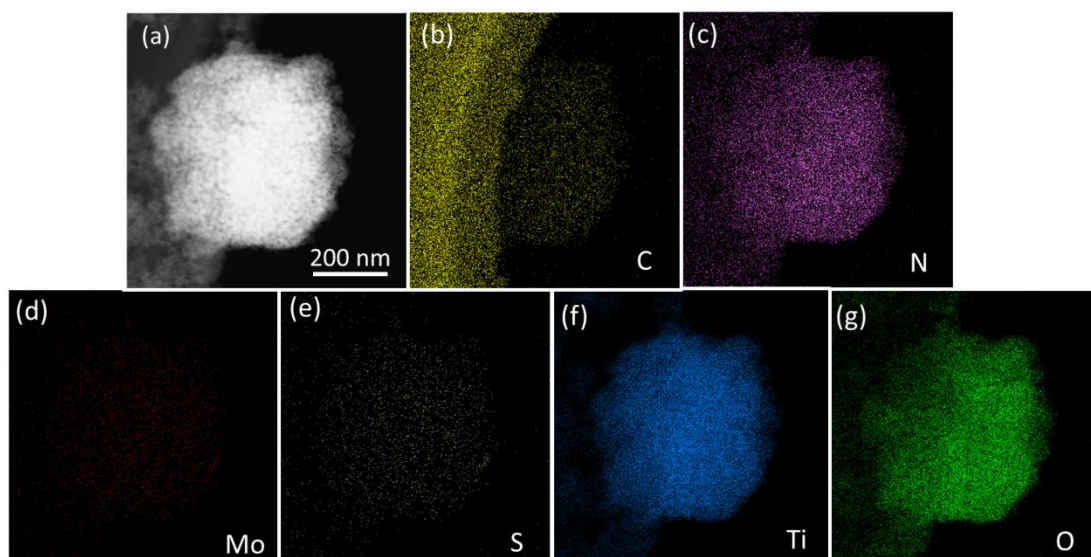

**Figure S13.** HAADF-STEM and elemental mapping images of 5% MoS<sub>2</sub>-NGC/TiO<sub>2</sub> photocatalyst.

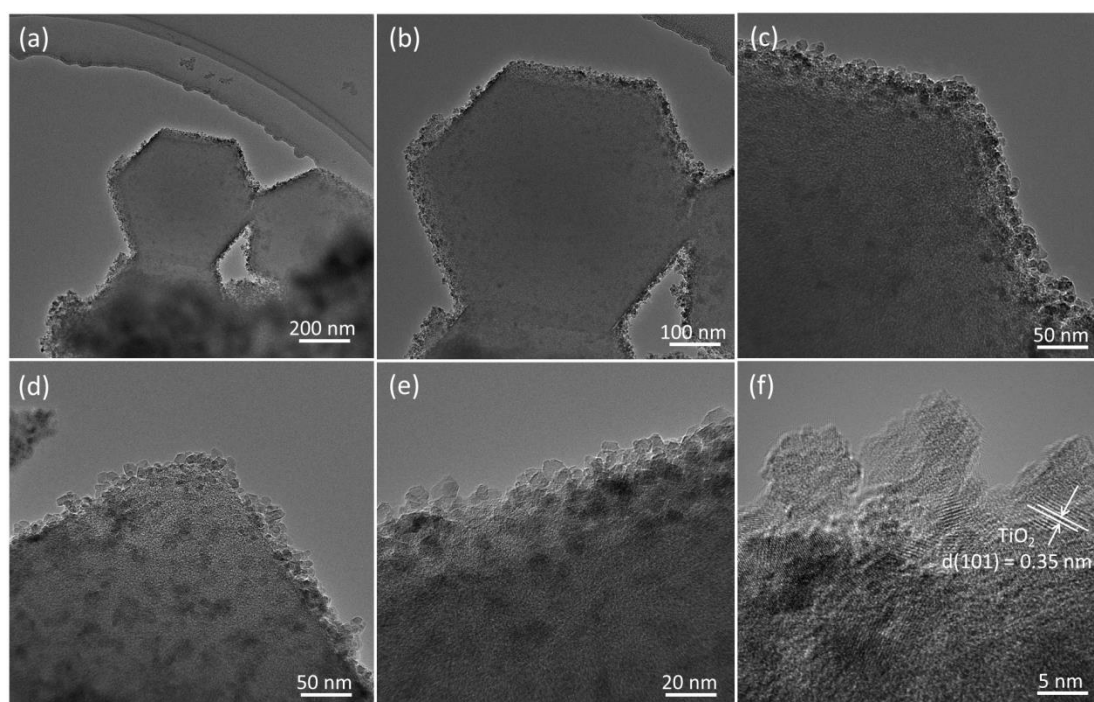

**Figure S14.** TEM and HRTEM images of 5% MoS<sub>2</sub>-NGC/TiO<sub>2</sub> photocatalyst.

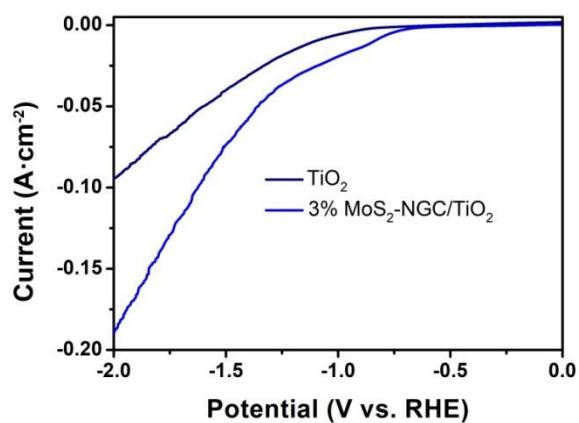

**Figure S15.** LSV plots of bare TiO<sub>2</sub> and 3% MoS<sub>2</sub>-NGC/TiO<sub>2</sub> electrodes.

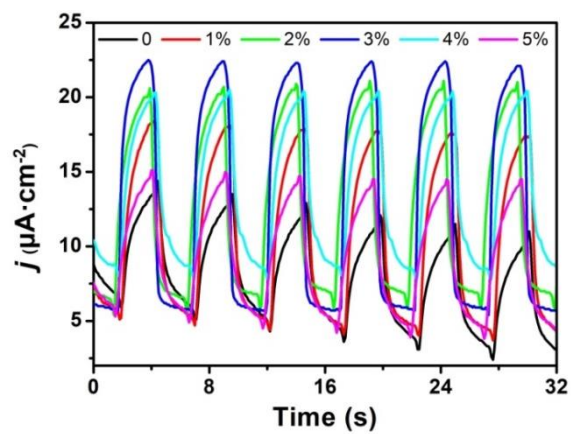

**Figure S16.** Photocurrent density of bare TiO<sub>2</sub> and various MoS<sub>2</sub>-NGC/TiO<sub>2</sub> electrodes.

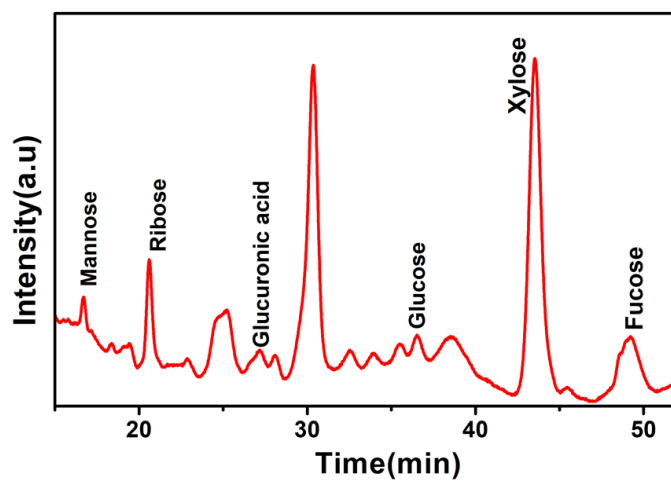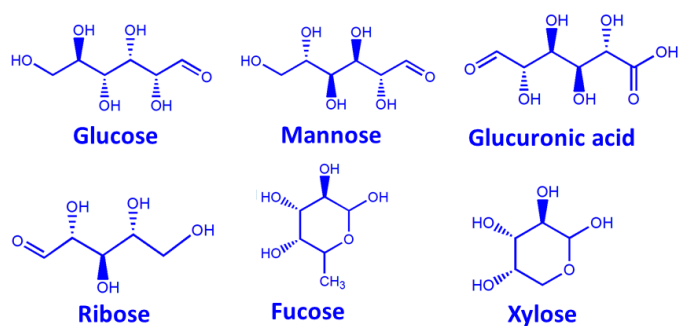

**Figure S17.** Liquid chromatography analysis for the sugar species as the decomposition products of  $\alpha$ -cellulose after photocatalytic  $H_2$  production reaction as well as their corresponding chemical structure.

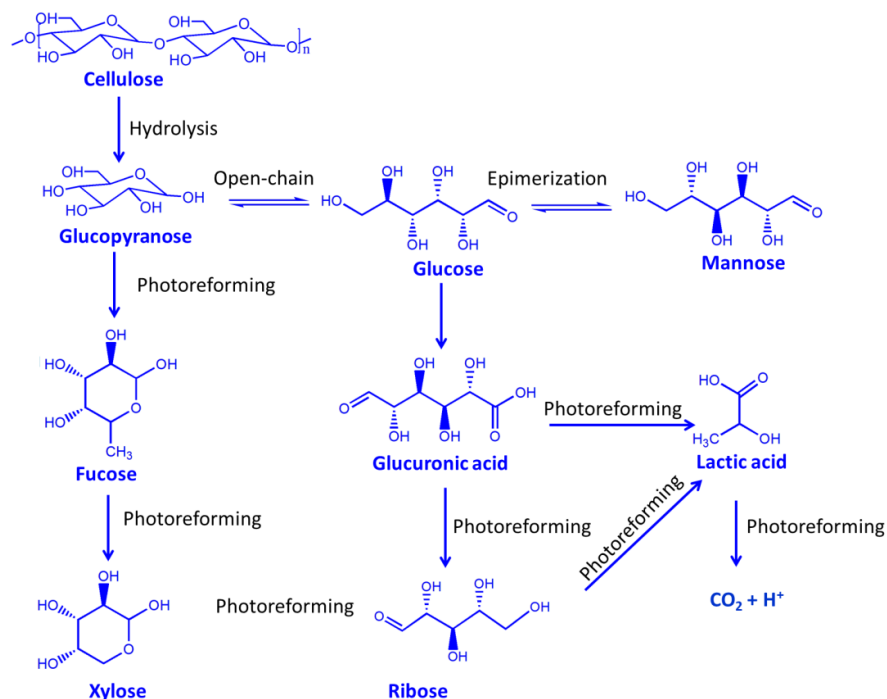

**Figure S18.** Proposed reaction mechanism for the decomposition of  $\alpha$ -cellulose during photoatalytic reaction. The  $\cdot\text{OH}$  radical with strong oxidation ability could promote the cleavage of  $\beta$ -1,4-glycosidic bonds of  $\alpha$ -cellulose, resulting in the hydrolysis of  $\alpha$ -cellulose and the formation of glucopyranose, glucose or fucose. And then, these monoses can be successively oxidized by  $\cdot\text{OH}$  or photogenerated hole to generate galacturonic acid, lactic acid,  $\text{CO}_2$  and other organics.

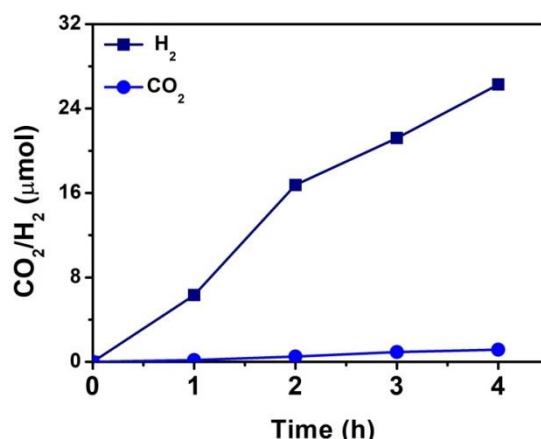

**Figure S19.** Time course of photocatalytic  $\text{H}_2$  and  $\text{CO}_2$  production over 3%  $\text{MoS}_2$ -NGC/ $\text{TiO}_2$  photocatalyst in  $\alpha$ -cellulose aqueous solution under 300 W Xe lamp irradiation.



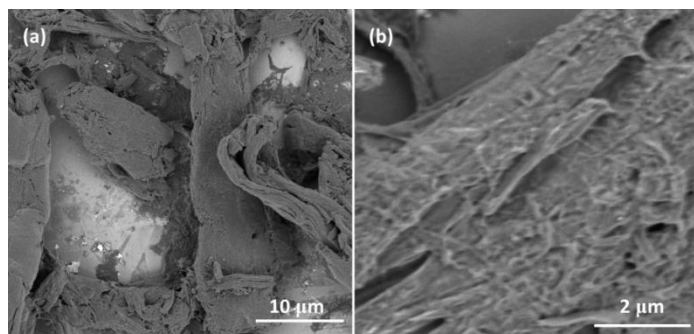

**Figure S20.** SEM images of fresh  $\alpha$ -cellulose (a) and solid residue from photocatalytic  $H_2$  production system after 8 h of irradiation and (b)

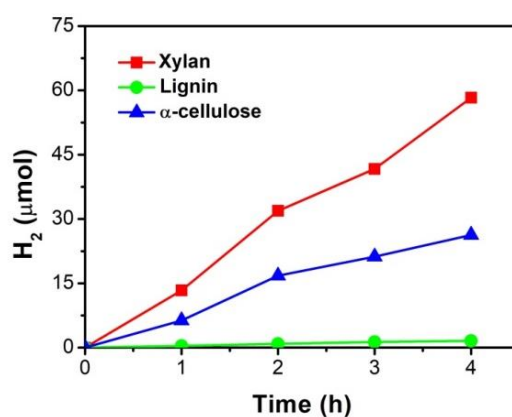

**Figure S21.** Time course of photocatalytic  $H_2$  production over 3%  $MoS_2$ -NGC/ $TiO_2$  photocatalyst in  $\alpha$ -cellulose, hemicelluloses (Xylan from corncob) and lignin aqueous solution under 300 W Xe lamp irradiation.

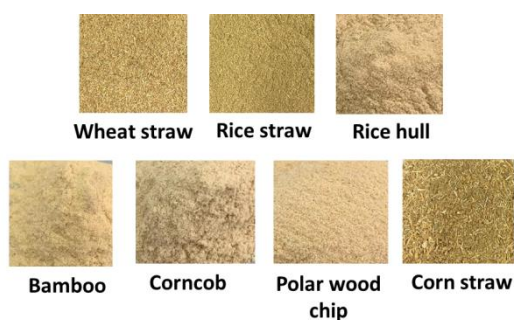

**Figure S22.** Photographs of wheat straw, corncob, polar wood chip, bamboo, rice hull, corn straw and rice straw.

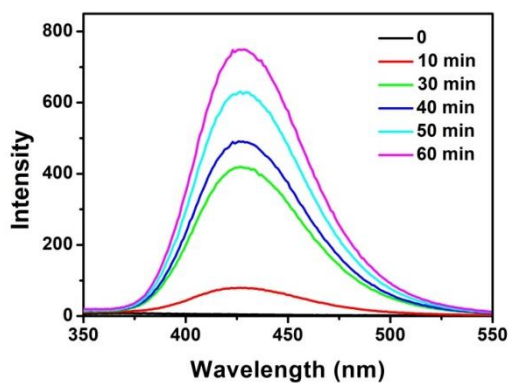

**Figure S23.** PL spectrum of TAOH collected from the photocatalytic system in the presence of 3% MoS<sub>2</sub>-NGC/TiO<sub>2</sub> after different irradiation time.

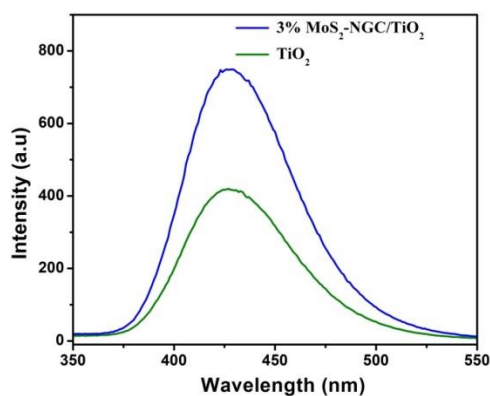

**Figure S24.** Comparison of PL spectrum of TAOH collected from the photocatalytic system in the presence of bare TiO<sub>2</sub> and 3% MoS<sub>2</sub>-NGC/TiO<sub>2</sub> after 1 h of irradiation.

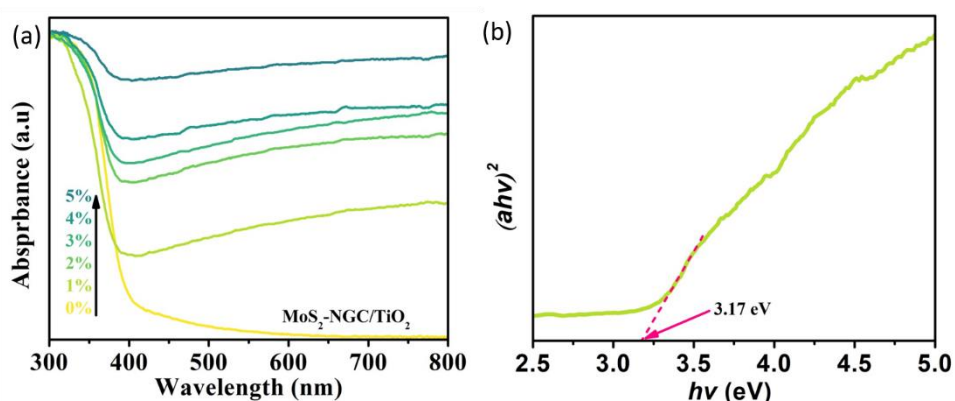

**Figure S25.** (a) UV-Vis spectra of MoS<sub>2</sub>-NGC/TiO<sub>2</sub> photocatalysts loaded with various amount of MoS<sub>2</sub>-NGC. (b) Bandgap of TiO<sub>2</sub> estimated by a related curve of  $(\alpha h\nu)^2$  versus photon energy.

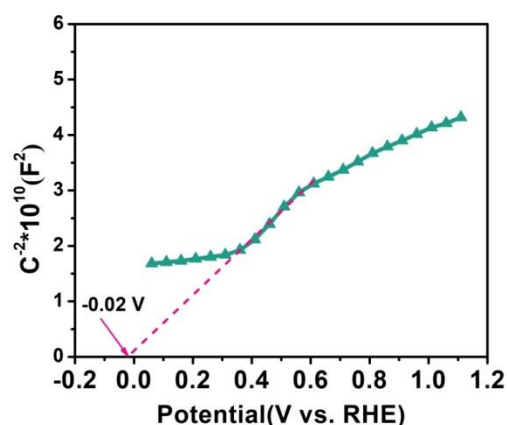

**Figure S26.** Mott-Schottky plots of TiO<sub>2</sub> electrode measured in Na<sub>2</sub>SO<sub>4</sub> aqueous solution. The flat band potential of TiO<sub>2</sub> was observed to be approximately -0.02 V vs. RHE, and thus the CB level was located at -0.22 V vs. RHE since the CB level position was more negative 0.2 eV than its flat band potential. The VB position of TiO<sub>2</sub> was estimated to +2.95 V vs. RHE because the bandgap of TiO<sub>2</sub> was observed to be 3.17 eV (Figure S21).

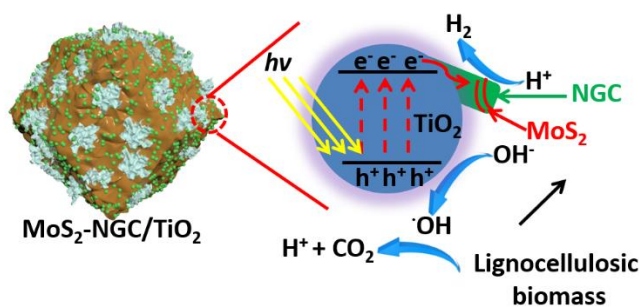

**Figure S27.** Proposed mechanism for photocatalytic H<sub>2</sub> production from lignocellulosic biomass over MoS<sub>2</sub>-NGC/TiO<sub>2</sub> photocatalysts.
